# Supplementary material
Source: PubMed Central journal article supplement (PMC4854713)
Supplement: supp_pp.16.00211_PP2016-00211DR1_Supplemental_Materialtbls.pdf [file supp_pp.16.00211_PP2016-00211DR1_Supplemental_Materialtbls.pdf]

**Supplemental table S1.** Total sugar amounts in seed mucilage sequentially extracted from *sbt1.7-3*, *gl2-6*, *gl2-7*, *gl2-8*, *gl2-9*, *luh-7*, *luh-8* and *mum2-15* compared to wild-type. Intact seeds were extracted sequentially with 0.05 M HCl - 0.3 M NaOH and rhamnogalacturonan hydrolase. Values (mg g<sup>-1</sup> of intact dry seeds)  $\pm$ SD of two biological repeats. WT, wild type.

| Genotypes       | HCl-NaOH          | Rhamnogalacturonan hydrolase |
|-----------------|-------------------|------------------------------|
| WTWs            | 29.08 $\pm$ 0.893 | 8.66 $\pm$ 0.135             |
| <i>sbt1.7-3</i> | 27.27 $\pm$ 0.445 | 8.32 $\pm$ 0.286             |
| <i>gl2-6</i>    | 8.89 $\pm$ 0.188  | 6.78 $\pm$ 0.029             |
| <i>gl2-7</i>    | 8.95 $\pm$ 0.197  | 5.14 $\pm$ 0.280             |
| <i>gl2-8</i>    | 5.98 $\pm$ 0.343  | 5.45 $\pm$ 0.123             |
| <i>gl2-9</i>    | 4.56 $\pm$ 0.056  | 5.66 $\pm$ 0.115             |
| <i>luh-7</i>    | 15.14 $\pm$ 1.538 | 10.72 $\pm$ 0.024            |
| <i>luh-8</i>    | 12.47 $\pm$ 0.311 | 11.31 $\pm$ 0.010            |
| <i>mum2-15</i>  | 20.51 $\pm$ 0.127 | 11.47 $\pm$ 0.857            |

**Supplemental table S2.** Monosaccharide Composition of Water-Extracted Mucilage.

Intact seeds were extracted with water for 3 h at room temperature with gentle shaking. Values (mg g<sup>-1</sup> of intact dry seeds)  $\pm$ SD of three biological repeats. n.d., not detected.

|                       | WTCol-2           | <i>mum5-1</i>     |
|-----------------------|-------------------|-------------------|
| Rha                   | 6.69 $\pm$ 0.225  | 9.92 $\pm$ 0.079  |
| Fuc                   | n.d.              | n.d.              |
| Ara                   | 0.15 $\pm$ 0.016  | 0.15 $\pm$ 0.007  |
| Xyl                   | 0.41 $\pm$ 0.014  | 0.23 $\pm$ 0.012  |
| Man                   | 0.23 $\pm$ 0.040  | 0.18 $\pm$ 0.031  |
| Gal                   | 0.30 $\pm$ 0.018  | 0.32 $\pm$ 0.028  |
| Glc                   | 0.74 $\pm$ 0.078  | 0.76 $\pm$ 0.031  |
| GalA                  | 10.15 $\pm$ 0.116 | 14.70 $\pm$ 0.113 |
| Total                 | 18.67 $\pm$ 0.114 | 26.26 $\pm$ 0.250 |
| Rha/Xyl (molar ratio) | 15                | 39                |

**Supplemental table S3.** Adsorption assays for three concentrations of enzymatically-tailored water-extracted mucilage from wild-type Col-0.

Water-extracted mucilage was partially degraded with rhamnogalacturonan hydrolase (3 h) and then precipitated with ethanol. The ethanol precipitate was recovered as enzymatically-tailored mucilage. The mass of bound material per mass of cellulose ( $q_e$ ) and the concentration of free material remaining in solution at equilibrium concentration ( $C_e$ ) were quantified. Values ( $C_e$ ,  $\mu\text{g/mL}$ ;  $q_e$ ,  $\mu\text{g.mg}^{-1}$  cellulose)  $\pm$ SD of two technical replicates.

|      | $C_e$              | $q_e$             |
|------|--------------------|-------------------|
| Rha  | $43.14 \pm 1.807$  | $3.25 \pm 0.163$  |
|      | $70.25 \pm 1.089$  | $7.70 \pm 2.711$  |
|      | $111.51 \pm 7.445$ | $13.78 \pm 1.117$ |
| Xyl  | $0.00 \pm 0.000$   | $11.43 \pm 1.835$ |
|      | $0.96 \pm 0.099$   | $15.48 \pm 0.148$ |
|      | $2.89 \pm 0.884$   | $23.88 \pm 1.326$ |
| GalA | $62.79 \pm 1.973$  | $5.45 \pm 0.296$  |
|      | $94.89 \pm 1.973$  | $7.11 \pm 0.296$  |
|      | $153.50 \pm 0.000$ | $18.83 \pm 0.000$ |

**Supplemental table S4.** Sequences of primers used for identification of homozygous mutants.

| <i>mum5</i> mutant/<br>T-DNA line      | Forward primer<br>sequence flanking<br>insertion site | Reverse primer<br>sequence flanking<br>insertion site | Insertion border primer<br>sequence                                   |
|----------------------------------------|-------------------------------------------------------|-------------------------------------------------------|-----------------------------------------------------------------------|
| <i>mum5</i> -2/<br>WiscDsLox<br>503F10 | 5'-<br><u>ATGAGGCAGAATCT</u><br><u>GAAAAAAG</u> -3'   | 5'-<br>GGTACTTCATGGAT<br>CACTTCGC-3'                  | p745 LB 5'-<br><u>AACGTCCGCAATGT</u><br><u>GTTATTAAGTTGTC</u> -<br>3' |
| <i>mum5</i> -3/<br>SALK_041744         | 5'-<br>CAAGAACCGGGTCT<br>CGAGGG-3'                    | 5'-<br><u>CACTTCAGTTTCCA</u><br><u>TTCATTAGG</u> -3'  | Sig LB1 : 5'-CGG AAC<br><u>CAC CAT CAA ACA</u><br><u>G</u> -3'        |

Underlined primers were used to amplify insertion border PCR fragment.
